# Supplementary material for: Detection of Inflammatory and Homeostasis Biomarkers after Selective Removal of Carious Dentin—An In Vivo Feasibility Study
Source: MDPI journal article supplement (doi:10.3390/jcm10051003), 2021-03-02
Supplement: s1 [file s1]

**Table S1.** Materials and devices used within the study.

| Material                      | Manufacturer                                        | Composition                                                                                                                                                                                                                                                                                                                        | Preparation/Application Procedure                                                                                                                                                                                                                                                        |
|-------------------------------|-----------------------------------------------------|------------------------------------------------------------------------------------------------------------------------------------------------------------------------------------------------------------------------------------------------------------------------------------------------------------------------------------|------------------------------------------------------------------------------------------------------------------------------------------------------------------------------------------------------------------------------------------------------------------------------------------|
| Biodentine™                   | Saint-Maur-des-Fossés Cedex, France                 | <b>Powder:</b> Tricalcium silicate, zirconium oxide, calcium oxide, calcium carbonate, and colourings.<br><b>Aqueous solution:</b> Calcium chloride and polycarboxylate.                                                                                                                                                           | 1) Gently tapping the capsule on a hard surface<br>2) Pouring of 5 drops from single-dose container into the capsule<br>3) Closing of capsule, placing capsule into mixing device (Cap-Mix) for 30 seconds                                                                               |
| SDR™                          | Dentsply DeTrey, Konstanz, Germany                  | Barium-alumino-fluoroborosilicate glass, strontiumaluminofluoro-silicate glass, modified urethane, dimethacrylate resin, EBPADMA, TEGDMA, CQ, photoaccelerator, BHT, UV stabilizer, titanium dioxide, iron oxide pigments, fluorescing agent                                                                                       | 1) Dispense SDR™ in layers of maximum 4 mm<br>2) Light-curing for at least 20 seconds per layer                                                                                                                                                                                          |
| CeramX™                       | Dentsply DeTrey, Konstanz, Germany                  | Ethoxylated Bisphenol A Dimethacrylate, Urethane modified Bis-GMA dimethacrylate resin, 2,2'-ethylenedioxydiethyl dimethacrylate, ytterbium trifluoride, 2,6-di-tert-butyl-p-cresol                                                                                                                                                | 1) Application of material in increments up to a thickness of 2 mm<br>2) Light-curing of each increment for at least 20 seconds<br>3) Finishing and polishing                                                                                                                            |
| Guttapercha Beefill Cartridge | VDW Dental, Munich, Germany                         | Zinc oxide, guttapercha, barium, sulfate, wax, composites, colourings                                                                                                                                                                                                                                                              | 1) Application of thermo-plasticized guttapercha on a spatula<br>2) Rapid adaption on the residual carious dentin nearby the pulp                                                                                                                                                        |
| Optibond™ FL                  | Kerr GmbH, Biberach, Germany                        | <b>Primer:</b> Ethanol, ethylethanol, 2-Hydroxyethylmethacrylate, GPDM, PAMA, water, Camphorquinone<br><b>Bond:</b> Bisphenol-A-dimethacrylate, 2-Hydroxyethylmethacrylate (HEMA), Triethylenglycoldimethacrylate, 3-Methacryloyl-oxypropyltrimethoxy-silane, Ba-Al silica glass, Camphorquinone, Na <sub>2</sub> SiF <sub>6</sub> | 1) Etching with phosphoric acid (37%) for 20 seconds<br>2) Rinsing with water for 15 seconds<br>3) mild air flow for drying for 5 seconds<br>4) Gently application of primer for 15seconds<br>5) mild air flow for 5 seconds<br>6) Application of bond<br>7) Light curing for 30 seconds |
| Clearfil™ SE Bond 2           | Kuraray Noritake Dental Corporation, Okayama, Japan | <b>Primer:</b> MDP, HEMA, Hydrophobic dimethacrylate. N-Diethanol-p-toluidine, amphoterquinone, water<br><b>Bond:</b> MDP, Bis-GMA, HEMA, silanated colloidal silica, hydrophobic dimethacrylate, Camphorquinone, water, N-Diethanol-p-toluidine                                                                                   | 1) Gently application of primer for 20 seconds<br>2) Mild air flow for drying for 10 seconds<br>3) Application of bond<br>4) Gently air flow<br>5) Light curing for 10 seconds                                                                                                           |
| Clearfil™ Protect Bond        | Kuraray Noritake Dental Corporation, Okayama, Japan | <b>Primer:</b> water, MDP, MDPB, HEMA, hydrophobic methacrylate<br><b>Bond:</b> MDP, DEMA, Bis-GMA, hydrophobic dimethacrylate, di-Camphorquinone, N-Diethanol-p-toluidine, silanated colloidal silica                                                                                                                             | 1) Gently application of primer for 20 seconds<br>2) Mild air flow for drying for 10 seconds<br>3) Application of bond<br>4) Gently air flow<br>5) Light curing for 10 seconds                                                                                                           |
| Opaldam                       | Ultradent Products, South Jordan, USA               | Cetylalkohol, Diurethan-dimethacrylate                                                                                                                                                                                                                                                                                             | 1) Application of the material in case of problems to seals the cavity with the matrix properly<br>2) Light-curing for at least 20 seconds                                                                                                                                               |
| PBST (10X)                    | G-Biosciences GmbH, St. Louis, USA                  | 80mM Na <sub>2</sub> HPO <sub>4</sub> , 1.5M NaCl, 20mM KH <sub>2</sub> PO <sub>4</sub> , 30mM KCl, 0.5% Tween® 20, pH 7.4.                                                                                                                                                                                                        | 1) Filling the prepared cavity with PBST<br>2) Incubating for 5 minutes                                                                                                                                                                                                                  |

**Table S2.** Quantitative evaluation of pro-inflammatory cytokines when all groups were pooled and differentiated for the single interventional groups: guttapercha (GP), Biodentine (BD), Clearfil Protect Bond (PB), Clearfil SE Bond 2 (SE) (median, maximum, minimum; concentration, pg/mL).

| <i>LegendPlex Panel</i> (BioLegend GmbH, Koblenz, Germany)                                                                                                                                                                                                                                                                                                                                                                                                                                                                                                                                                                                                                                                                                                                                                                                                                                                                                                                                                                                                                                                                                                                                                                                                                                                                                                                                                                                                                                                                                                                                                                                                                                                                                                                                                                                                                                                                                                                                                                                                                                                                                                                                                                                                                                                                                                                                                                                                                                                                                                                                                                                                             | Analysis of IL-1 $\beta$ , IL-6, IL-10, CRP, TNF- $\alpha$ , IFN- $\gamma$ , TIMP-1, TIMP-2 |
|------------------------------------------------------------------------------------------------------------------------------------------------------------------------------------------------------------------------------------------------------------------------------------------------------------------------------------------------------------------------------------------------------------------------------------------------------------------------------------------------------------------------------------------------------------------------------------------------------------------------------------------------------------------------------------------------------------------------------------------------------------------------------------------------------------------------------------------------------------------------------------------------------------------------------------------------------------------------------------------------------------------------------------------------------------------------------------------------------------------------------------------------------------------------------------------------------------------------------------------------------------------------------------------------------------------------------------------------------------------------------------------------------------------------------------------------------------------------------------------------------------------------------------------------------------------------------------------------------------------------------------------------------------------------------------------------------------------------------------------------------------------------------------------------------------------------------------------------------------------------------------------------------------------------------------------------------------------------------------------------------------------------------------------------------------------------------------------------------------------------------------------------------------------------------------------------------------------------------------------------------------------------------------------------------------------------------------------------------------------------------------------------------------------------------------------------------------------------------------------------------------------------------------------------------------------------------------------------------------------------------------------------------------------------|---------------------------------------------------------------------------------------------|
| <ul style="list-style-type: none"> <li>• preparation of the masterplate (96 well plate), dilutions were performed on second 96 well plate (1:1 dilution, sample volume 30 <math>\mu</math>L + assay buffer 30 <math>\mu</math>L)</li> <li>• preparation of wash buffer: 47.5 mL deionized water + 2.5 mL wash buffer 20X</li> <li>• preparation of matrix: lyophilized matrix + 5 mL assay buffer (vortex!)</li> <li>• preparation of standard: lyophilized standard cocktail + 250 <math>\mu</math>L assay buffer               <ul style="list-style-type: none"> <li>○ standard = C7, labelling of tubes C7- C0</li> <li>○ addition of 75 <math>\mu</math>L of assay buffer to C6-C1, preparation of 1:4 dilution transferring 25 <math>\mu</math>L of the standard</li> </ul> </li> </ul> <p>The entire assay was performed on a filter-well plate.</p> <ul style="list-style-type: none"> <li>• addition of 100 <math>\mu</math>L wash buffer to filter plate, let sit for 1 min at room temperature</li> <li>• centrifugation for 30 seconds at 300 rpm, flow through discarded</li> <li>• addition of 25 <math>\mu</math>L of assay buffer to the sample wells</li> <li>• addition of 25 <math>\mu</math>L of matrix to the standard wells</li> <li>• addition of 25 <math>\mu</math>L of each standard to the standard wells</li> <li>• addition of 25 <math>\mu</math>L of each diluted sample to the sample wells and vortex</li> <li>• addition of 25 <math>\mu</math>L beads to each well (volume should be 75 <math>\mu</math>L in each well)</li> <li>• overnight on a plate shaker (500 rpm 4 °C), sealing the plate with aluminium foil</li> <li>• next day: centrifugation 30 seconds, 300 rpm, flow through discarded</li> <li>• addition of 200 <math>\mu</math>L wash buffer to each well and centrifugation 30 seconds, 300 rpm to remove wash buffer, repetition</li> <li>• addition of 25 <math>\mu</math>L detection antibodies (biotinylated) to each well, sealing the plate with aluminum foil</li> <li>• shaking for 30 min 500 rpm at room temperature</li> <li>• addition of 25 <math>\mu</math>L of SA-PE to each well and sealing the plate with aluminium foil</li> <li>• shaking for 30 min 500 rpm at room temperature on a plate shaker, centrifugation 30 seconds at 300 rpm, flow through discarded</li> <li>• addition of 200 <math>\mu</math>L wash buffer to each well, centrifugation 30 seconds at 300 rpm to remove wash buffer, repetition</li> <li>• addition of 150 <math>\mu</math>L wash buffer to each wellse</li> <li>• reading samples on flow cytometer with 300 events per cytokine, thus 1500 events</li> </ul> |                                                                                             |
| <i>Human Custom 3-Plex assay</i> (Aimplex Biosciences, Inc., Pomona, USA)                                                                                                                                                                                                                                                                                                                                                                                                                                                                                                                                                                                                                                                                                                                                                                                                                                                                                                                                                                                                                                                                                                                                                                                                                                                                                                                                                                                                                                                                                                                                                                                                                                                                                                                                                                                                                                                                                                                                                                                                                                                                                                                                                                                                                                                                                                                                                                                                                                                                                                                                                                                              | Analysis of MMP-7, -8, -9                                                                   |
| <ul style="list-style-type: none"> <li>• preparation of wash buffer: 135 mL deionized water + 15 mL wash buffer 10X</li> <li>• preparation of reading buffer: 45 mL deionized water + 5 mL reading buffer 10X</li> <li>• preparation of the lyophilized standard: 250 <math>\mu</math>L standard diluent + lyophilized standard (vortex for 15 seconds), incubation on ice for 10 min               <ul style="list-style-type: none"> <li>○ serial dilution preparation:</li> <li>○ standard = C7, labelling of tubes C7- C0</li> <li>○ addition of 160 <math>\mu</math>L of standard diluent to C6-C1, preparation of 1:3 dilution transferring 80 <math>\mu</math>L of the standard</li> </ul> </li> </ul> <p>The entire assay was performed on a filter-plate.</p> <ul style="list-style-type: none"> <li>• preparation of filter plate: wash with 100 <math>\mu</math>L wash buffer, centrifugation at 300 rpm for 30 seconds, flow-through discarded</li> <li>• addition of 45 <math>\mu</math>L bead suspension to each well, centrifugation at 300 rpm for 30 seconds, flow-through discarded</li> <li>• addition of 30 <math>\mu</math>L assay buffer to each sample well</li> <li>• addition of 15 <math>\mu</math>L of samples (no dilution!) to each sample well</li> <li>• addition of 45 <math>\mu</math>L standard to each standard well</li> <li>• sealing the plate with aluminium foil</li> <li>• overnight incubation on a plate shaker (500 rpm at 4 °C)</li> <li>• washing the wells 3 times with 100 <math>\mu</math>L wash buffer and centrifugation at 300 rpm for 30 seconds, flow-through discarded after each washing step</li> <li>• addition of 25 <math>\mu</math>L of biotinylated antibody working solution to each well</li> <li>• sealing the plate with aluminium foil</li> <li>• shaking at 500 rpm for 1 hour at room temperature</li> <li>• washing the wells 3 times with 100 <math>\mu</math>L wash buffer and centrifugation at 300 rpm for 30 seconds, flow-through discarded</li> <li>• addition of 25 <math>\mu</math>L of SA-PE to each well and sealing the plate with aluminium foil</li> </ul>                                                                                                                                                                                                                                                                                                                                                                                                                                                                                                                         |                                                                                             |

- shaking at 500 rpm for 30 min at room temperature
- washing the wells twice with 100 µL wash buffer, centrifugation at 300 rpm for 30 seconds, flow-through discarded after each washing step
- addition of 150 µL reading buffer and covering the plate with a plate seal
- reading samples on flow cytometer with 100 events per cytokine, thus 300 events

SA-PE: Streptavidin-Phycoerythrin

**Table S3.** Quantitative evaluation of pro-inflammatory cytokines when all groups were pooled and differentiated for the single interventional groups: guttapercha (GP), Biodentine (BD), Clearfil Protect Bond (PB), Clearfil SE Bond 2 (SE) (median, maximum, minimum; concentration, pg/mL).

| Median (Min – Max), pg/mL  |                            |                         |                  |                        |                       |                  |                               |                            |                  |
|----------------------------|----------------------------|-------------------------|------------------|------------------------|-----------------------|------------------|-------------------------------|----------------------------|------------------|
|                            | IL-1 $\beta$<br>visit 1    | IL-1 $\beta$<br>visit 2 | $p^{\dagger}$    | IL-6<br>visit 1        | IL-6<br>visit 2       | $p^{\dagger}$    | CRP<br>visit 1                | CRP<br>visit 2             | $p^{\dagger}$    |
| <b>all groups</b>          | 107.35<br>(0.96 – 1728.60) | 2.27<br>(0.00 – 213.59) | <b>&lt;0.001</b> | 3.81<br>(0 – 58.54)    | 0.00<br>(0.00 – 4.33) | <b>&lt;0.001</b> | 304.89<br>(0.00 – 20626.52)   | 67.76<br>(0.00 – 3628.34)  | <b>&lt;0.001</b> |
| <b>GP</b>                  | 111.10<br>(0.96 – 1728.60) | 8.45<br>(0.00 – 213.59) | <b>0.008</b>     | 4.71<br>(0.00 – 41.88) | 0.00<br>(0.00 – 4.33) | <b>0.028</b>     | 377.67<br>(0.00 – 12752.43)   | 85.87<br>(0.00 – 1287.02)  | <b>0.041</b>     |
| <b>BD</b>                  | 115.98<br>(1.32 – 1456.96) | 2.14<br>(0 – 97.14)     | <b>0.007</b>     | 3.81<br>(0.00 – 14.31) | 0.00<br>(0.00 – 2.21) | <b>0.012</b>     | 1018.74<br>(15.96 – 20626.52) | 98.01<br>(18.05 – 3628.34) | <b>0.047</b>     |
| <b>PB</b>                  | 103.59<br>(3.06 – 496.85)  | 1.08<br>(0.00 – 12.63)  | <b>0.018</b>     | 0.00<br>(0.00 – 43.90) | 0.00<br>(0.00 – 0.00) | 0.109            | 219.21<br>(18.05 – 1019.85)   | 67.76<br>(0.00 – 438.42)   | 0.091            |
| <b>SE</b>                  | 66.51<br>(5.95 – 237.22)   | 0.00<br>(0.00 – 21.03)  | <b>0.028</b>     | 6.49<br>(0.00 – 58.54) | 0.00<br>(0.00 – 0.00) | 0.068            | 131.13<br>(44.68 – 788.36)    | 39.90<br>(0.00 – 273.4)    | 0.091            |
| <sup>†</sup> Wilcoxon test |                            |                         |                  |                        |                       |                  |                               |                            |                  |

**Table S4.** Quantitative evaluation of matrix metalloproteinases when all groups were pooled and differentiated for the single interventional groups: guttapercha (GP), Biodentine (BD), Clearfil Protect Bond (PB), Clearfil SE Bond 2 (SE) (median, maximum, minimum; concentration, pg/mL).

| Median (Min – Max), pg/mL |                            |                             |               |                                |                                 |               |                                |                                |               |
|---------------------------|----------------------------|-----------------------------|---------------|--------------------------------|---------------------------------|---------------|--------------------------------|--------------------------------|---------------|
|                           | MMP-7<br>visit 1           | MMP-7<br>visit 2            | $p^{\dagger}$ | MMP-8<br>visit 1               | MMP-8<br>visit 2                | $p^{\dagger}$ | MMP-9<br>visit 1               | MMP-9<br>visit 2               | $p^{\dagger}$ |
| <b>all groups</b>         | 141.42<br>(52.83 – 547.36) | 155.56<br>(60.61 – 653.22)  | 0.122         | 2481.63<br>(72.67 – 29168.48)  | 7805.40<br>(26.46 – 146831.88)  | <b>0.016</b>  | 822.15<br>(46.79 – 108743.19)  | 1363.22<br>(43.71 – 176680.20) | 0.264         |
| <b>GP</b>                 | 141.42<br>(78.08 – 435.72) | 307.02<br>(73.18 – 653.22)  | 0.214         | 3694.43<br>(374.34 – 17979.70) | 8488.92<br>(270.48 – 146831.88) | 0.173         | 413.46<br>(68.62 – 108743.19)  | 818.44<br>(49.89 – 176680.20)  | 0.314         |
| <b>BD</b>                 | 123.88<br>(52.83 – 247.92) | 126.13<br>(60.61 – 291.18)  | 0.263         | 641.09<br>(72.67 – 13570.06)   | 7495.00<br>(26.46 – 53568.46)   | 0.161         | 648.67<br>(46.79 – 3988.13)    | 285.14<br>(43.71 – 31259.98)   | 0.327         |
| <b>PB</b>                 | 195.11<br>(75.64 – 519.7)  | 200.84<br>(136.42 – 515.07) | 0.612         | 3046.79<br>(97.41 – 17278.35)  | 12535.42<br>(113.24 – 52973.52) | 0.176         | 3526.33<br>(78.05 – 30313.80)  | 6923.04<br>(193.92 – 35758.05) | 0.499         |
| <b>SE</b>                 | 148.79<br>(68.21 – 547.36) | 156.15<br>(99.37 – 539.64)  | 0.735         | 1989.71<br>(233.24 – 29168.48) | 3192.24<br>(208.54 – 25914.02)  | 0.866         | 1828.00<br>(193.92 – 29148.36) | 1291.75<br>(100.11 – 14007.14) | 0.499         |
